# Supplementary material for: COVID-19, Myocarditis and Pericarditis
Source: PubMed Central journal article supplement — Circ Res. 2023 May 12;132(10):1302–19. doi: 10.1161/CIRCRESAHA.123.321878 (PMC10171304; doi:10.1161/circresaha.123.321878), 2023-05-12
Supplement: res-132-1302-s001.pdf [file res-132-1302-s001.pdf]

# COVID-19, Myocarditis and Pericarditis

DeLisa Fairweather<sup>1-3\*#</sup>, Danielle J. Beetler<sup>1,3-4\*</sup>, Damian N. DiFlorio<sup>1,3-4</sup>, Nicolas Musigk<sup>5</sup>, Bettina Heidecker<sup>5</sup>, Leslie T. Cooper Jr.<sup>1</sup>

## Supplementary Data

### Tables

Supplementary Table 1. Animal models of myocarditis<sup>1-4</sup>

|                            | <b>Virus-only models</b><br>(e.g., CVB3*,<br>EMCV, Rheovirus) | <b>Autoimmune virus models</b> (e.g., EAM,<br>CVB3, MCMV) | <b>Autoimmune models</b> (e.g., EAM)        |
|----------------------------|---------------------------------------------------------------|-----------------------------------------------------------|---------------------------------------------|
| <b>Survival</b>            | 20-30% by day 7                                               | 100% survival                                             | 100% survival                               |
| <b>Necrosis</b>            | High levels                                                   | Low, appears day 35                                       | Low, appears day 45                         |
| <b>Viral replication</b>   | 10 <sup>7</sup> -10 <sup>9</sup> PFU/g heart                  | 10 <sup>3</sup> -10 <sup>5</sup> PFU/g heart              | No virus in model                           |
| <b>Acute myocarditis</b>   | Peak at day 7                                                 | Peak at day 10                                            | Peak at day 21                              |
| <b>Key cell mediators</b>  | CVB3: $\gamma\delta$ T cells &<br>CD8 T cells                 | CVB3: CD11b+<br>macrophages & MCs,<br>T & B cells         | CD11b+<br>macrophages & MCs,<br>T & B cells |
| <b>Chronic myocarditis</b> | Most do not survive                                           | Starts day 35                                             | Starts day 45                               |
| <b>Progression to DCM</b>  | Yes, in survivors                                             | Yes (BALB/c, A/J)                                         | Yes (BALB/c, A/J)                           |
| <b>Sex differences</b>     | Males worse                                                   | Males worse                                               | Males worse                                 |

\* **Abbreviations:** CVB3, coxsackievirus B3; DCM, dilated cardiomyopathy; EAM, experimental autoimmune myocarditis; EMCV, encephalomyocarditis virus; MCMV, murine cytomegalovirus; MCs, mast cells; PFU, plaque forming units.

Supplementary Table 2. Several large epidemiological studies of SARS-CoV-2 myocarditis and pericarditis

| <b>Location</b> | <b>n</b>  | <b>Incidence or increased risk of myocarditis/<br/>pericarditis after COVID-19*</b>                                                                               | <b>Reference</b> |
|-----------------|-----------|-------------------------------------------------------------------------------------------------------------------------------------------------------------------|------------------|
| <b>US</b>       | 1,452,773 | 16x greater risk with COVID; 9/100,000 no COVID vs. 150/100,000 with COVID; myocarditis occurred 42.3% more in 2020 than 2019; risk higher in males than females  | 5                |
| <b>US</b>       | 718,365   | 5% increase myocarditis & 1.5% pericarditis                                                                                                                       | 6                |
| <b>US</b>       | 691,455   | 1-12 months after COVID infection, myocarditis HR=4.41, 95% CI 2.89-6.72; pericarditis HR=1.62, 95% CI 1.45-1.81, more cases in younger age under 40 and in males | 7                |
| <b>Israel</b>   | 233,392   | Myocarditis RR=18.28, 95% CI 3.95-25.12; incidence myocarditis 11/100,000 and 11/100,000 pericarditis after COVID                                                 | 8                |

|                      |         |                                                                                                                                            |    |
|----------------------|---------|--------------------------------------------------------------------------------------------------------------------------------------------|----|
| <b>Israel</b>        | 196,992 | No association of myocarditis or pericarditis with “long-COVID” (i.e., developing after acute infection resolves)                          | 9  |
| <b>US</b>            | 193,113 | 14% increased risk of sequelae including myocarditis/cardiomyopathy                                                                        | 10 |
| <b>US</b>            | 107,699 | COVID-19 group, 79 (0.12%) patients had new-onset myocarditis compared to 29 (0.04%) in the non-COVID-19 control                           | 11 |
| <b>Spain</b>         | 74,814  | Myopericarditis OR=4.43, 95% CI 3.98-4.94                                                                                                  | 12 |
| <b>US</b>            | 70,288  | Myocarditis (OR 8.17, 95% CI 3.58–18.62, absolute risk 0.1%)                                                                               | 13 |
| <b>Europe and US</b> | 56,963  | Myocarditis (definite/ probable) 240/100,000, (possible) 410/100,000 patients hospitalized for COVID-19                                    | 14 |
| <b>Hong Kong</b>     | 11,441  | Compared to the background rate, the rate of myopericarditis among vaccinated subjects in Hong Kong was similar 0.55/100,000 (5.5/million) | 15 |

\*Abbreviations: aRR, adjusted relative risk; CI, confidence intervals; IRR, incidence rate ratio; OR, odds ratio; RI, relative incidence; RR, relative risk or risk ratio

Supplemental Table 3. Large epidemiological studies of COVID-19 vaccine-associated myocarditis/pericarditis

| <b>Location</b>  | <b>Vaccine</b>                                                     | <b>Incidence of myocarditis/pericarditis after 2<sup>nd</sup> dose (95% CI)*</b>                                                                                                                                         | <b><i>n</i></b> | <b>Reference</b> |
|------------------|--------------------------------------------------------------------|--------------------------------------------------------------------------------------------------------------------------------------------------------------------------------------------------------------------------|-----------------|------------------|
| <b>Worldwide</b> | Moderna                                                            | Overall 9.23/100,000, males 18-24 years 53.76/100,000, males <40 years RR=3.10, (2.68-3.58)                                                                                                                              | 252,000,000     | 16               |
| <b>US</b>        | Pfizer<br>Moderna                                                  | US VAERS 82% of cases were male, 69% of cases were White; reporting rates highest after second dose: males 12-15 years 7.1/100,000, males 16-17 10.6/100,000, males 18-24 5.2/100,000 (Pfizer) and 5.6/100,000 (Moderna) | 192,405,448     | 17               |
| <b>UK</b>        | Pfizer<br>Moderna<br>AstraZeneca                                   | 1/100,000 (Pfizer), 1.4/100,000 (Moderna), 0.5/100,000 (AstraZeneca) reporting rates overall for all doses, highest in 18-29 years group and males for mRNA vaccines, especially after second dose                       | 53,000,000      | 18               |
| <b>Canada</b>    | Pfizer<br>Moderna<br>AstraZeneca<br>Noravax<br>Janssen<br>Medicago | 97.8% associated with mRNA vaccines, 62% of those associated with second dose: 65% male, median age 25 years (Pfizer); 76% male, median age 28 (Moderna)                                                                 | 32,438,982      | 19               |

|                    |                                             | other                                                                                                                                                                                                                                                                                                 |                      |    |
|--------------------|---------------------------------------------|-------------------------------------------------------------------------------------------------------------------------------------------------------------------------------------------------------------------------------------------------------------------------------------------------------|----------------------|----|
| <b>France</b>      | Pfizer<br>Moderna                           | Pfizer/BNT162b2 myocarditis OR=6.9 (5.7–8.4), pericarditis OR=2.7 (2.2–3.5); Moderna/mRNA-1273 myocarditis OR=27 (19–39), pericarditis OR=5.3 (3.3–8.4)                                                                                                                                               | 32,000,000           | 20 |
| <b>Europe</b>      | Pfizer<br>Moderna<br>AstraZeneca            | Increased risk after 1st & 2nd dose. Myocarditis Pfizer/BNT162b2 aRR=1.75 (1.43-2.14), Moderna/mRNA-1273 aRR=6.57 (4.64-9.28), Males 16-24 years BNT162b2 aRR=5.31 (3.68-7.68), mRNA-1273 aRR=13.83 (8.08-23.68)                                                                                      | 23,122,522           | 21 |
| <b>UK</b>          | Pfizer<br>Moderna<br>AstraZeneca            | Increased risk from 1 <sup>st</sup> and 2 <sup>nd</sup> dose but increased risk of myocarditis only in those under 40 years of age                                                                                                                                                                    | 20,615,911           | 22 |
| <b>Singapore</b>   | Pfizer<br>Moderna                           | Overall 0.1-1/100,000, incidence highest in young males <30 years                                                                                                                                                                                                                                     | 5,241,294            | 23 |
| <b>Israel</b>      | Pfizer                                      | Myocarditis RR=5.34 (4.48-6.40), males 16-19 years greatest risk: IRR=13.60 (9.30-19.20)                                                                                                                                                                                                              | 5,000,000            | 24 |
| <b>Denmark</b>     | Pfizer<br>Moderna<br>AstraZeneca<br>Janssen | 40% of cases in patients 12-39 years, 73% of cases were male; Pfizer/BNT162b2 overall 1.4/100,000; males 1.5/100,000; females 1.3 females; age 12-39 males & females 1.6/100,000; Moderna/mRNA-1273 overall 4.2/100,00; males 6.3/100,000; females 2.0/100,000; age 12-39 males & females 5.7/100,000 | 3,482,295<br>498,814 | 25 |
| <b>Italy</b>       | Pfizer<br>Moderna                           | Increased risk with Pfizer after 2nd dose and with Moderna for 1st and 2nd dose; Myocarditis BNT162b2 RR=1.99 (1.30 to 3.05); mRNA-1273 RR=2.63 (1.21 to 5.71); highest risk males 12-39 years with mRNA-1273 RI=11.91 (3.88 to 36.53)                                                                | 2,861,809            | 26 |
| <b>US Military</b> | Pfizer<br>Moderna                           | Incidence not reported                                                                                                                                                                                                                                                                                | 2,810,000            | 27 |
| <b>Israel</b>      | Pfizer                                      | Myocarditis 1st dose: 2.13/100,000 (1.56-2.70); Males 16-29 years 10.69/100,000 (6.93 to 14.46)                                                                                                                                                                                                       | 2,500,000            | 28 |

|                      |                          |                                                                                                                                                                                                                  |           |    |
|----------------------|--------------------------|------------------------------------------------------------------------------------------------------------------------------------------------------------------------------------------------------------------|-----------|----|
| <b>US</b>            | Pfizer<br>Moderna        | Increased risk in 18-39 years,<br>2.2/100,000 (Pfizer), 3.1/100,000<br>(Moderna), 86% of cases were male                                                                                                         | 2,403,307 | 29 |
| <b>US</b>            | Pfizer<br>Moderna        | Myocarditis 2.7 (95% CI, 1.4-4.8)- all<br>were males, study did not separate<br>data by vaccine type, all under 40<br>years of age- most under 25 years;<br>64% White                                            | 2,392,924 | 30 |
| <b>Hong<br/>Kong</b> | Pfizer<br>Sinovac        | Sex and age not reported for<br>myocarditis risk, myocarditis and<br>pericarditis combined 10/100,000<br>(Pfizer), 3/100,000 (CoronaVac)                                                                         | 2,333,379 | 31 |
| <b>US</b>            | Pfizer<br>Moderna<br>J&J | Myocarditis 1 case/100,000;<br>pericarditis 1.9 cases/100,000; 75%<br>males for both; myocarditis young<br>under 40 years, pericarditis older over<br>50 years; myocarditis 95% White,<br>pericarditis 84% White | 2,000,287 | 32 |
| <b>Israel</b>        | Pfizer                   | Vaccinated & matched controls of<br>same size 2.7/100,000 (1.0-4.6);<br>RR=3.24 (1.55 to 12.44), no analysis<br>by sex and age                                                                                   | 884,828   | 8  |

\*Abbreviations: aRR, adjusted relative risk; CI, confidence intervals; IRR, incidence rate ratio; OR, odds ratio; RI, relative incidence; RR, relative risk or risk ratio; VAERS, vaccine adverse event reporting system

Supplementary Table 4. Most common COVID-19 vaccines<sup>33-35</sup>

| <b>Developer</b>            | <b>Common names</b>                                                                                              | <b>Vaccine type</b>                                                           | <b>Emergency Use Listing by WHO</b> | <b>Main usage</b>                    |
|-----------------------------|------------------------------------------------------------------------------------------------------------------|-------------------------------------------------------------------------------|-------------------------------------|--------------------------------------|
| <b>BioNTech/<br/>Pfizer</b> | BNT162b2,<br>Comirnaty,<br>Tozinameran                                                                           | nucleoside modified<br>mRNA                                                   | 31-Dec-20                           | approved<br>in US,<br>widely<br>used |
| <b>AstraZeneca</b>          | Oxford-<br>AstraZeneca,<br>CHADOX1<br>NCOV-19,<br>Covishield,<br>Vaxzevria,<br>AZD1222,<br>ChAdOx1_nCoV1,<br>SII | recombinant ChAdOx1<br>adenoviral vector<br>encoding spike protein<br>antigen | 16-Feb-21                           | widely<br>used                       |

|                                            |                                         |                                                                                               |           |                                       |
|--------------------------------------------|-----------------------------------------|-----------------------------------------------------------------------------------------------|-----------|---------------------------------------|
| <b>Johnson &amp; Johnson</b>               | J&J, Janssen, Jcovden, Ad26.COV 2.S     | recombinant, replication incompetent adenovirus type 26 vector vaccine encoding spike protein | 12-Mar-21 | approved in US, widely used           |
| <b>Moderna</b>                             | Moderna, Elasmoran, SpikeVax, mRNA 1273 | mRNA                                                                                          | 30-Apr-21 | approved in US, widely used           |
| <b>China National Pharmaceutical Group</b> | Sinopharm BIBP                          | Inactivated virus, produced in Vero cells                                                     | 7-May-21  | Southeast Asia, Africa, South America |
| <b>Sinovac Biotech</b>                     | Coronavac                               | Inactivated virus, produced in Vero cells                                                     | 1-Jun-21  | Southeast Asia, Africa, South America |
| <b>Bharat Biotech</b>                      | COVAXIN, BBV152                         |                                                                                               | 3-Nov-21  | South Asia, Africa, South America     |
| <b>Novavax</b>                             | NVX-CoV2373, Covovax, Nuvaxovoid        | protein subunit vaccine                                                                       | 20-Dec-21 | approved in US, widely used           |
| <b>Gamaleya Research Institute</b>         | Sputnik V                               | human adenovirus vector-based                                                                 | n/a       | Russia                                |

\*Abbreviations: n/a, not available; US, United States; WHO, World Health Organization.

## References

1. Fairweather D, Kaya Z, Shellam GR, Lawson CM, Rose NR. From infection to autoimmunity. *J Autoimmun.* 2001;16:175-186

2. Fairweather D, Stafford KA, Sung YK. Update on coxsackievirus B3 myocarditis. *Curr Opin Rheumatol.* 2012;24:401-407
3. Pankuweit S KK. Viral myocarditis: From experimental models to diagnosis in patients. In: Caforio A, ed. *Myocarditis: Pathogenesis, diagnosis and treatment.* Switzerland: Springer Nature; 2020:91-110.
4. Poli V BK, Fairweather D. Autoimmune myocarditis: Animal models. In: Caforio A, ed. *Myocarditis: Pathogenesis, diagnosis and treatment.* Switzerland: Springer Nature; 2020:111-128.
5. Boehmer TK, Kompaniyets L, Lavery AM, Hsu J, Ko JY, Yusuf H, et al. Association between COVID-19 and myocarditis using hospital-based administrative data - United States, March 2020-January 2021. *MMWR Morb Mortal Wkly Rep.* 2021;70:1228-1232
6. Buckley BJR, Harrison SL, Fazio-Eynullayeva E, Underhill P, Lane DA, Lip GYH. Prevalence and clinical outcomes of myocarditis and pericarditis in 718,365 COVID-19 patients. *Eur J Clin Invest.* 2021;51:e13679
7. Wang W, Wang CY, Wang SI, Wei JC. Long-term cardiovascular outcomes in COVID-19 survivors among non-vaccinated population: A retrospective cohort study from the TRINETX US collaborative networks. *EClinicalMedicine.* 2022;53:101619
8. Barda N, Dagan N, Ben-Shlomo Y, Kepten E, Waxman J, Ohana R, et al. Safety of the BNT162b2 mRNA COVID-19 vaccine in a nationwide setting. *N Engl J Med.* 2021;385:1078-1090
9. Tuvali O, Tshori S, Derazne E, Hannuna RR, Afek A, Haberman D, et al. The incidence of myocarditis and pericarditis in post COVID-19 unvaccinated patients- A large population-based study. *J Clin Med.* 2022;11

10. Daugherty SE, Guo Y, Heath K, Dasmarinas MC, Jubilo KG, Samranvedhya J, et al. Risk of clinical sequelae after the acute phase of SARS-CoV-2 infection: Retrospective cohort study. *BMJ*. 2021;373:n1098
11. Priyadarshni S, Westra J, Kuo YF, Baillargeon JG, Khalife W, Raji M. COVID-19 infection and incidence of myocarditis: A multi-site population-based propensity score-matched analysis. *Cureus*. 2022;14:e21879
12. Miro O, Sabate M, Jimenez S, Mebazaa A, Martinez-Nadal G, Pinera P, et al. A case-control, multicentre study of consecutive patients with COVID-19 and acute (myo)pericarditis: Incidence, risk factors, clinical characteristics and outcomes. *Emerg Med J*. 2022;39:402-410
13. Murk W, Gierada M, Fralick M, Weckstein A, Klesh R, Rassen JA. Diagnosis-wide analysis of COVID-19 complications: An exposure-crossover study. *CMAJ*. 2021;193:E10-E18
14. Ammirati E, Lupi L, Palazzini M, Hendren NS, Grodin JL, Cannistraci CV, et al. Prevalence, characteristics, and outcomes of COVID-19-associated acute myocarditis. *Circulation*. 2022;145:1123-1139
15. Chou OHI, Zhou J, Lee TTL, Kot T, Lee S, Wai AKC, et al. Comparisons of the risk of myopericarditis between COVID-19 patients and individuals receiving COVID-19 vaccines: A population-based study. *Clin Res Cardiol*. 2022;111:1098-1103
16. Straus W, Urdaneta V, Esposito DB, Mansi JA, Rodriguez CS, Burton P, et al. Analysis of myocarditis among 252 million mRNA-1273 recipients worldwide. *Clin Infect Dis*. 2022
17. Oster ME, Shay DK, Su JR, Gee J, Creech CB, Broder KR, et al. Myocarditis cases reported after mRNA-based COVID-19 vaccination in the US from December 2020 to August 2021. *JAMA*. 2022;327:331-340
18. GOV.UK. Archived - coronavirus vaccine - summary of yellow card reporting. 2023

19. Canada Go. Reported side effects following COVID-19 vaccination in Canada. 2023
20. Le Vu S, Bertrand M, Jabagi MJ, Botton J, Drouin J, Baricault B, et al. Age and sex-specific risks of myocarditis and pericarditis following COVID-19 messenger RNA vaccines. *Nat Commun.* 2022;13:3633
21. Karlstad O, Hovi P, Husby A, Harkanen T, Selmer RM, Pihlstrom N, et al. SARS-CoV-2 vaccination and myocarditis in a Nordic cohort study of 23 million residents. *JAMA Cardiol.* 2022;7:600-612
22. Patone M, Mei XW, Handunnetthi L, Dixon S, Zaccardi F, Shankar-Hari M, et al. Risks of myocarditis, pericarditis, and cardiac arrhythmias associated with COVID-19 vaccination or SARS-CoV-2 infection. *Nat Med.* 2022;28:410-422
23. Authority HS. HSA's safety update #9 COVID-19 vaccine. 2021:1-10
24. Mevorach D, Anis E, Cedar N, Bromberg M, Haas EJ, Nadir E, et al. Myocarditis after BNT162b2 mRNA vaccine against COVID-19 in Israel. *N Engl J Med.* 2021;385:2140-2149
25. Husby A, Hansen JV, Fosbol E, Thiesson EM, Madsen M, Thomsen RW, et al. SARS-CoV-2 vaccination and myocarditis or myopericarditis: Population based cohort study. *BMJ.* 2021;375:e068665
26. Massari M, Spila Alegiani S, Morciano C, Spuri M, Marchione P, Felicetti P, et al. Postmarketing active surveillance of myocarditis and pericarditis following vaccination with COVID-19 mRNA vaccines in persons aged 12 to 39 years in Italy: A multi-database, self-controlled case series study. *PLoS Med.* 2022;19:e1004056
27. Montgomery J, Ryan M, Engler R, Hoffman D, McClenathan B, Collins L, et al. Myocarditis following immunization with mRNA COVID-19 vaccines in members of the US military. *JAMA Cardiol.* 2021;6:1202-1206



28. Witberg G, Barda N, Hoss S, Richter I, Wiessman M, Aviv Y, et al. Myocarditis after COVID-19 vaccination in a large health care organization. *N Engl J Med.* 2021;385:2132-2139
29. Goddard K, Lewis N, Fireman B, Weintraub E, Shimabukuro T, Zerbo O, et al. Risk of myocarditis and pericarditis following BNT162b2 and mRNA-1273 COVID-19 vaccination. *Vaccine.* 2022;40:5153-5159
30. Simone A, Herald J, Chen A, Gulati N, Shen AY, Lewin B, et al. Acute myocarditis following COVID-19 mRNA vaccination in adults aged 18 years or older. *JAMA Intern Med.* 2021;181:1668-1670
31. Wong CKH, Lau KTK, Xiong X, Au ICH, Lai FTT, Wan EYF, et al. Adverse events of special interest and mortality following vaccination with mRNA (BNT162b2) and inactivated (coronavac) SARS-CoV-2 vaccines in Hong Kong: A retrospective study. *PLoS Med.* 2022;19:e1004018
32. Diaz GA, Parsons GT, Gering SK, Meier AR, Hutchinson IV, Robicsek A. Myocarditis and pericarditis after vaccination for COVID-19. *JAMA.* 2021;326:1210-1212
33. Organization WH. Coronavirus disease (COVID-19): Vaccines. 2022
34. Organization WH. Status of COVID-19 vaccines within WHO EUL/PQ evaluation process. 2021:1-2
35. Center for Disease Control and Prevention. Overview of COVID-19 vaccines. 2022
